# Supplementary material
Source: PubMed Central journal article supplement (PMC8110309)
Supplement: ehp8905.smcontents.508.pdf [file ehp8905.smcontents.508.pdf]

**Note to readers with disabilities:** *EHP* strives to ensure that all journal content is accessible to all readers. However, some figures and Supplemental Material published in *EHP* articles may not conform to [508 standards](#) due to the complexity of the information being presented. If you need assistance accessing journal content, please contact [ehp508@niehs.nih.gov](mailto:ehp508@niehs.nih.gov). Our staff will work with you to assess and meet your accessibility needs within 3 working days.

### **Supplemental Material**

#### **The Effects of Chronic Exposure to Ambient Traffic-Related Air Pollution on Alzheimer's Disease Phenotypes in Wildtype and Genetically Predisposed Male and Female Rats**

Kelley T. Patten, Anthony E. Valenzuela, Christopher Wallis, Elizabeth L. Berg, Jill L. Silverman, Keith J. Bein, Anthony S. Wexler, and Pamela J. Lein

#### **Table of Contents**

##### **Materials**

**Table S1.** Antibodies and conditions used in immunohistochemistry (IHC) analyses.

**Table S2.** Summary of regional analysis of ThioS staining in 15 month-old TgF344-AD rats.

**Table S3.** Summary of major effects of TRAP by age and endpoint.

**Table S4.** Summary of numeric data in Figure 1.

**Table S5.** Summary of numeric data in Figure 2.

**Table S6.** Summary of numeric data in Figure 3 and Figure S2.

**Table S7.** Summary of numeric data in Figure 4 and Figure S3.

**Table S8.** Summary of numeric data in Figure 5.

**Table S9.** Summary of numeric data in Figure 6.

**Figure S1.** Photo montage of the various systems comprising the Tunnel Exposure Facility.

**Figure S2.** Effects of TRAP on cued fear conditioning and neuronal cell loss in the hippocampus. (A-B) Cued fear conditioning was performed on-site at 9.5 or 14.5 month old animals for the 10 and 15 month-old cohort. An increased average motion index indicates impaired cognitive behavior. (C-D) To assess neuronal cell loss, brain sections were immunostained for NeuN, a biomarker of neurons, and the number of NeuN-immunopositive cells per mm<sup>2</sup> were counted in the CA1. (E) Densitometric analyses of total tau relative to GAPDH in the crude pellet fraction of cortical tissue. All data presented as the mean  $\pm$  SD (n=10-12 animals per group for A-D; n=5-6 animals per group for E). Data were analyzed by three-way ANOVA using sex, genotype, and exposure as factors (A-B, E) or two-way ANOVA using genotype and exposures as factors (C, D) with *post-hoc* Sidak's test; \*p<0.05. Circles represent individual animals (for C-E, each circle is an average of 4 technical replicates). M=male; F=female; WT=wildtype; Tg=TgF344-AD. Summary values are available in Table S6.

**Figure S3.** Effects of TRAP on A $\beta$  deposition by brain region, and on guanidine-HCL soluble brain extracts. (A) Analyses of ThioS<sup>+</sup> plaques by brain regions in TgF344-AD rats (DG=dentate gyrus; EC=entorhinal cortex; Thal=thalamus; Cer=cerebellum) (B) Guanidine-HCL-soluble ratios of A $\beta$ 42:40, as measured by ELISA in cortical samples and normalized to A $\beta$  levels in 3-month-old WT female rats. All data presented as the mean  $\pm$  SD (n=5-6 animals per group). Circles represent individual animals. Four brain sections were measured per animal in A, and two technical replicates were performed for each animal in B. M=male; F=female. Data were analyzed by three-way ANOVA using sex, genotype, and exposure as factors, with *post-hoc* Sidak's test. \*p<0.05. Summary data are available in Table S7.
